# Supplementary material for: Fetal Gene Variants Associated With Birth Weight Protection in a Native High Altitude Ladakhi Population
Source: Research Square preprint supplement (doi:10.21203/rs.3.rs-931753/v1), 2021-10-14
Supplement: Supplementary file 2 [file cd4c5ab96a2aa7d5493ff840.docx]

| **CHR** | **SNP** | **Mapped Gene** | **SNP_ Annotation** | **P-values** | **Beta values** | **MAF** | **GWAS_Trait of mapped gene** |
| --- | --- | --- | --- | --- | --- | --- | --- |
| 11 | rs361294 | *PDGFD* | Intronic/ regulatory | 4.436E-07 | 0.2227 | 0.1994 | Blood protein levels |
| 12 | rs5028677 | *SOX5* | Intronic | 0.0001999 | 0.1425 | 0.5 | Height, BMI |
| 22 | rs362043 | *TUBA8* | Intronic- up/down | 0.000184 | -1.44E-01 | 0.211 | Atrial fibrillation |
| 15 | rs12908321 | *ARNT2* | Intronic | 0.0001275 | 1.65E-01 | 0.2717 | Response to bronchodilator |
| 9 | rs10968576 | *LINGO2* | Intronic | 0.00000457 | -2.22E-01 | 0.1994 | rs10968576 BMI variant |
| 4 | rs2298839 | *AFP* | Splice region/ intronic | 0.0001411 | -0.1367 | 0.4535 | Mean platelet volume- 0.000005785 |
| 16 | rs8051912 | *CRISPLD2* | Intronic | 0.0001952 | 0.1629 | 2.457 | Body height |
| 6 | rs9261425 | *TRIM31* | Intronic, up/down | 0.0001979 | 0.1426 | 0.3208 | WBC count-1.618E-62 |
| 6 | rs16893892 | *ZSCAN26* | Intronic/ missense | 0.00006706 | -0.1881 | 0.1734 | Mean corpuscular Hgb-1.123e-03 |
| 7 | rs17137016 | *LHFPL3* | Intronic | 0.0002034 | 0.1321 | 0.4827 | Weight |
| 7 | rs4596555 | *AOAH* | Regulatory/ intronic/ down | 0.0001988 | -0.1565 | 0.2948 | Body Fat |
| 5 | rs6601019 | *ADAMTS2* | Intronic/ upsteam gene | 0.0001874 | 0.1631 | 0.2659 | Height, Body fat |
| 3 | rs9837853 | *ARHGAP31* | Regulatory/ intronic | 0.0001901 | 0.1594 | 0.2413 | Lung function |
| 3 | rs2715613 | *RAB6B* | Intronic | 0.0002952 | -0.1854 | 0.1618 | Mean corpuscular Hgb/lung function |
| 11 | rs2278844 | *PC* | Regulatory /intronic | 0.0001209 | 0.1705 | 0.2428 | lung function |
| 11 | rs3815984 | *SPON1* | Intronic | 0.00008638 | -0.1827 | 0.1994 | Blood protein levels, Height |
| 6 | rs12529267 | *SYNE1* | Intronic | 0.0000922 | -0.2272 | 0.1185 | Lung function |
| 1 | rs1878747 | *PRKCZ* | Intronic/ down | 0.00005893 | 0.154 | 0.4566 | Height |
| 14 | rs1876529 | *TMEM63C* | Intronic/ down | 0.0003334 | 0.2057 | 0.1156 | Waist-hip ratio |
| 9 | rs1023181 | *PCSK5* | Intronic | 0.000274 | -0.1261 | 0.3902 | Height, Lung function |

**Table S1 Top 20 Ladakhi specific birthweight associated variants**

S1 Top 20 Ladakhi variants with chromosomal position, Single Nucleotide Polymorphism (SNP), Mapped gene, SNP annotation, P value, Beta value, Minor Allele Frequency (MAF) and genome wide association study (GWAS) trait of mapped gene.
